# Supplementary material for: Synthesis and optical characterizations of chain-like Si@SiSe2nanowire heterostructures
Source: Royal Society of Chemistry journal article supplement (doi:10.1039/c1nr10844a), 2011-11-03
Supplement: c1nr10844a.pdf [file c1nr10844a.pdf]

# Synthesis and optical characterizations of chain-like Si@SiSe<sub>2</sub> nanowire heterostructures

Jinyou Xu,<sup>§</sup> Hongxing Li,<sup>§</sup> Xiujuan Zhuang, Qinglin Zhang, Pengfei Guo, Liang Ma  
and Anlian Pan\*

*College of Physics and Microelectronics Science, Key Laboratory for Micro-Nano  
Physics and Technology of Hunan Province, Hunan University, Changsha (410082),  
China*

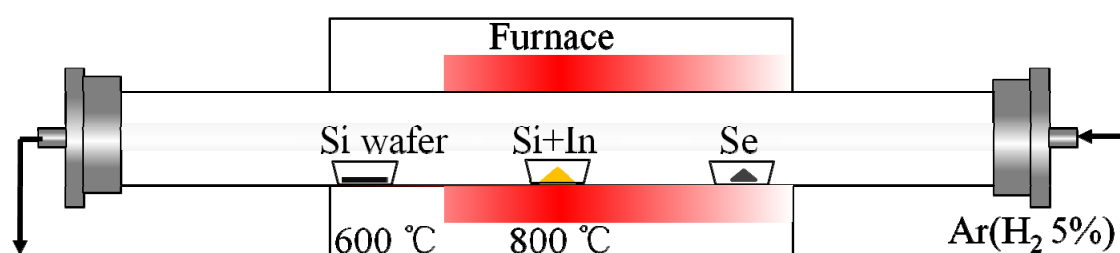

**Figure S1.** Experiment setup.

| Ele. | Wei.% | Ato.% | Ele. | Wei.% | Ato.% |
|------|-------|-------|------|-------|-------|
| O    | 8.81  | 16.64 | O    | 14.62 | 36.57 |
| Si   | 68.03 | 73.18 | Si   | 20.72 | 29.52 |
| Cu   | 14.03 | 6.67  | Cu   | 17.55 | 11.05 |
| Se   | 9.12  | 3.49  | Se   | 40.57 | 20.56 |
|      |       |       | In   | 6.52  | 2.27  |

**Figure S2.** Relative proportions of the detected elements collected from the NW trunk (left table) and the bulbs (right table), respectively.

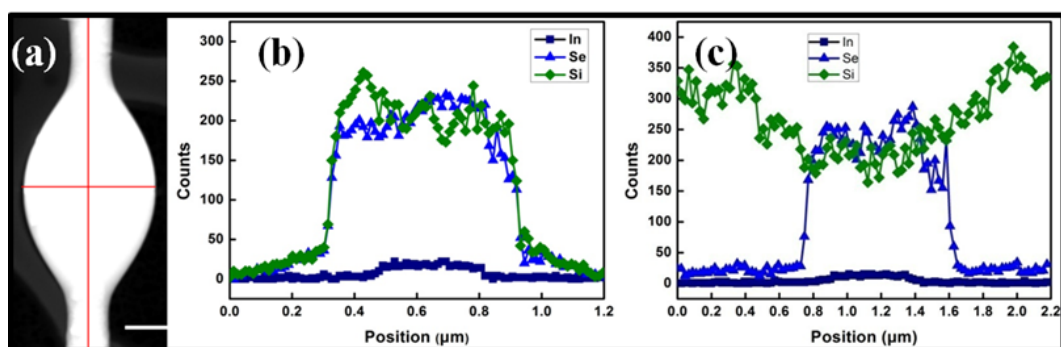

**Figure S3.** Line scanning of elements Si, Se, and In within a selected olive-shaped bulb. (a) HAADF image. Line scanning along the horizontal (b) and vertical (c) direction indicated with red lines in (a), respectively.

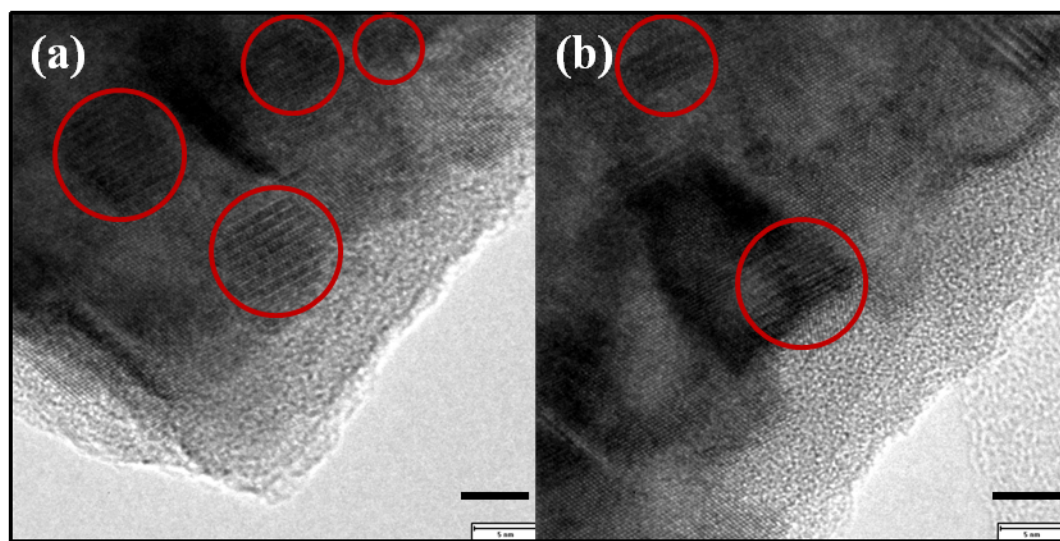

**Figure S4.** HRTEM images. The red circles indicates the existence of c-SiSe<sub>2</sub> fragments with diameters less than 10nm (scale bar=5nm).

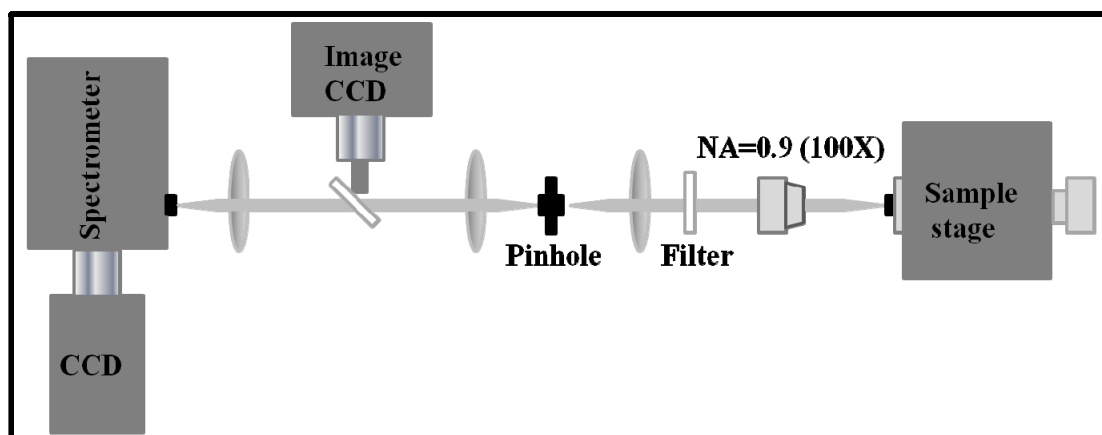

**Figure S5.** Schematic optical setup used for the optical study of individual chain-like NWs.

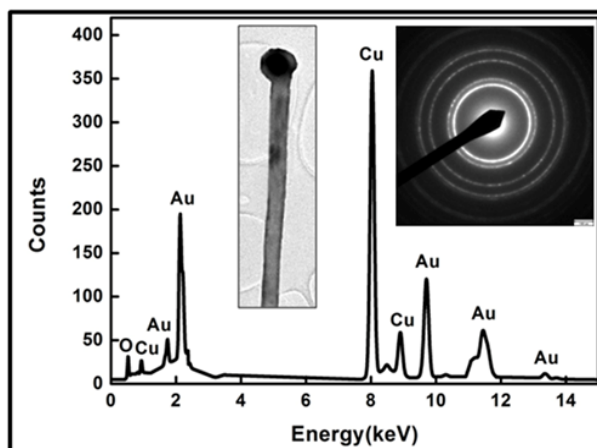

**Figure S6.** EDX spectrum of the catalyst, indicate that the tip is mainly composed of Au elements.

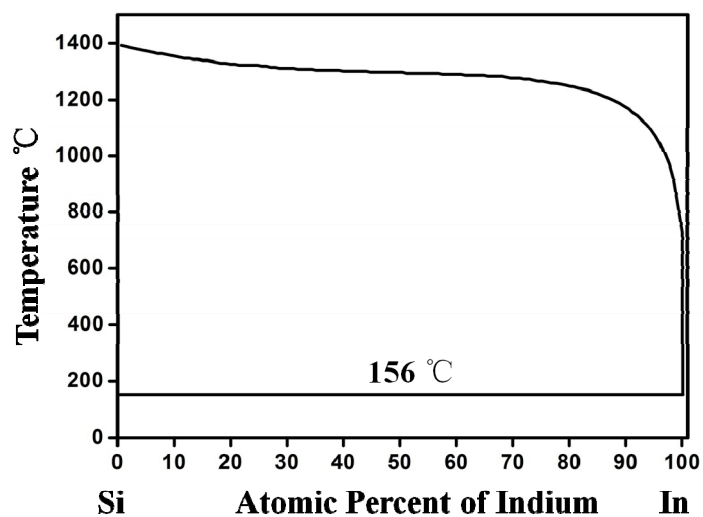

**Figure S7.** Phase diagram of Si-In alloy system.
